# Supplementary material
Source: PubMed Central journal article supplement (PMC11029024)
Supplement: 262_2010_928_MOESM1_ESM.pdf [file 262_2010_928_MOESM1_ESM.pdf]

Supplementary Figure 1

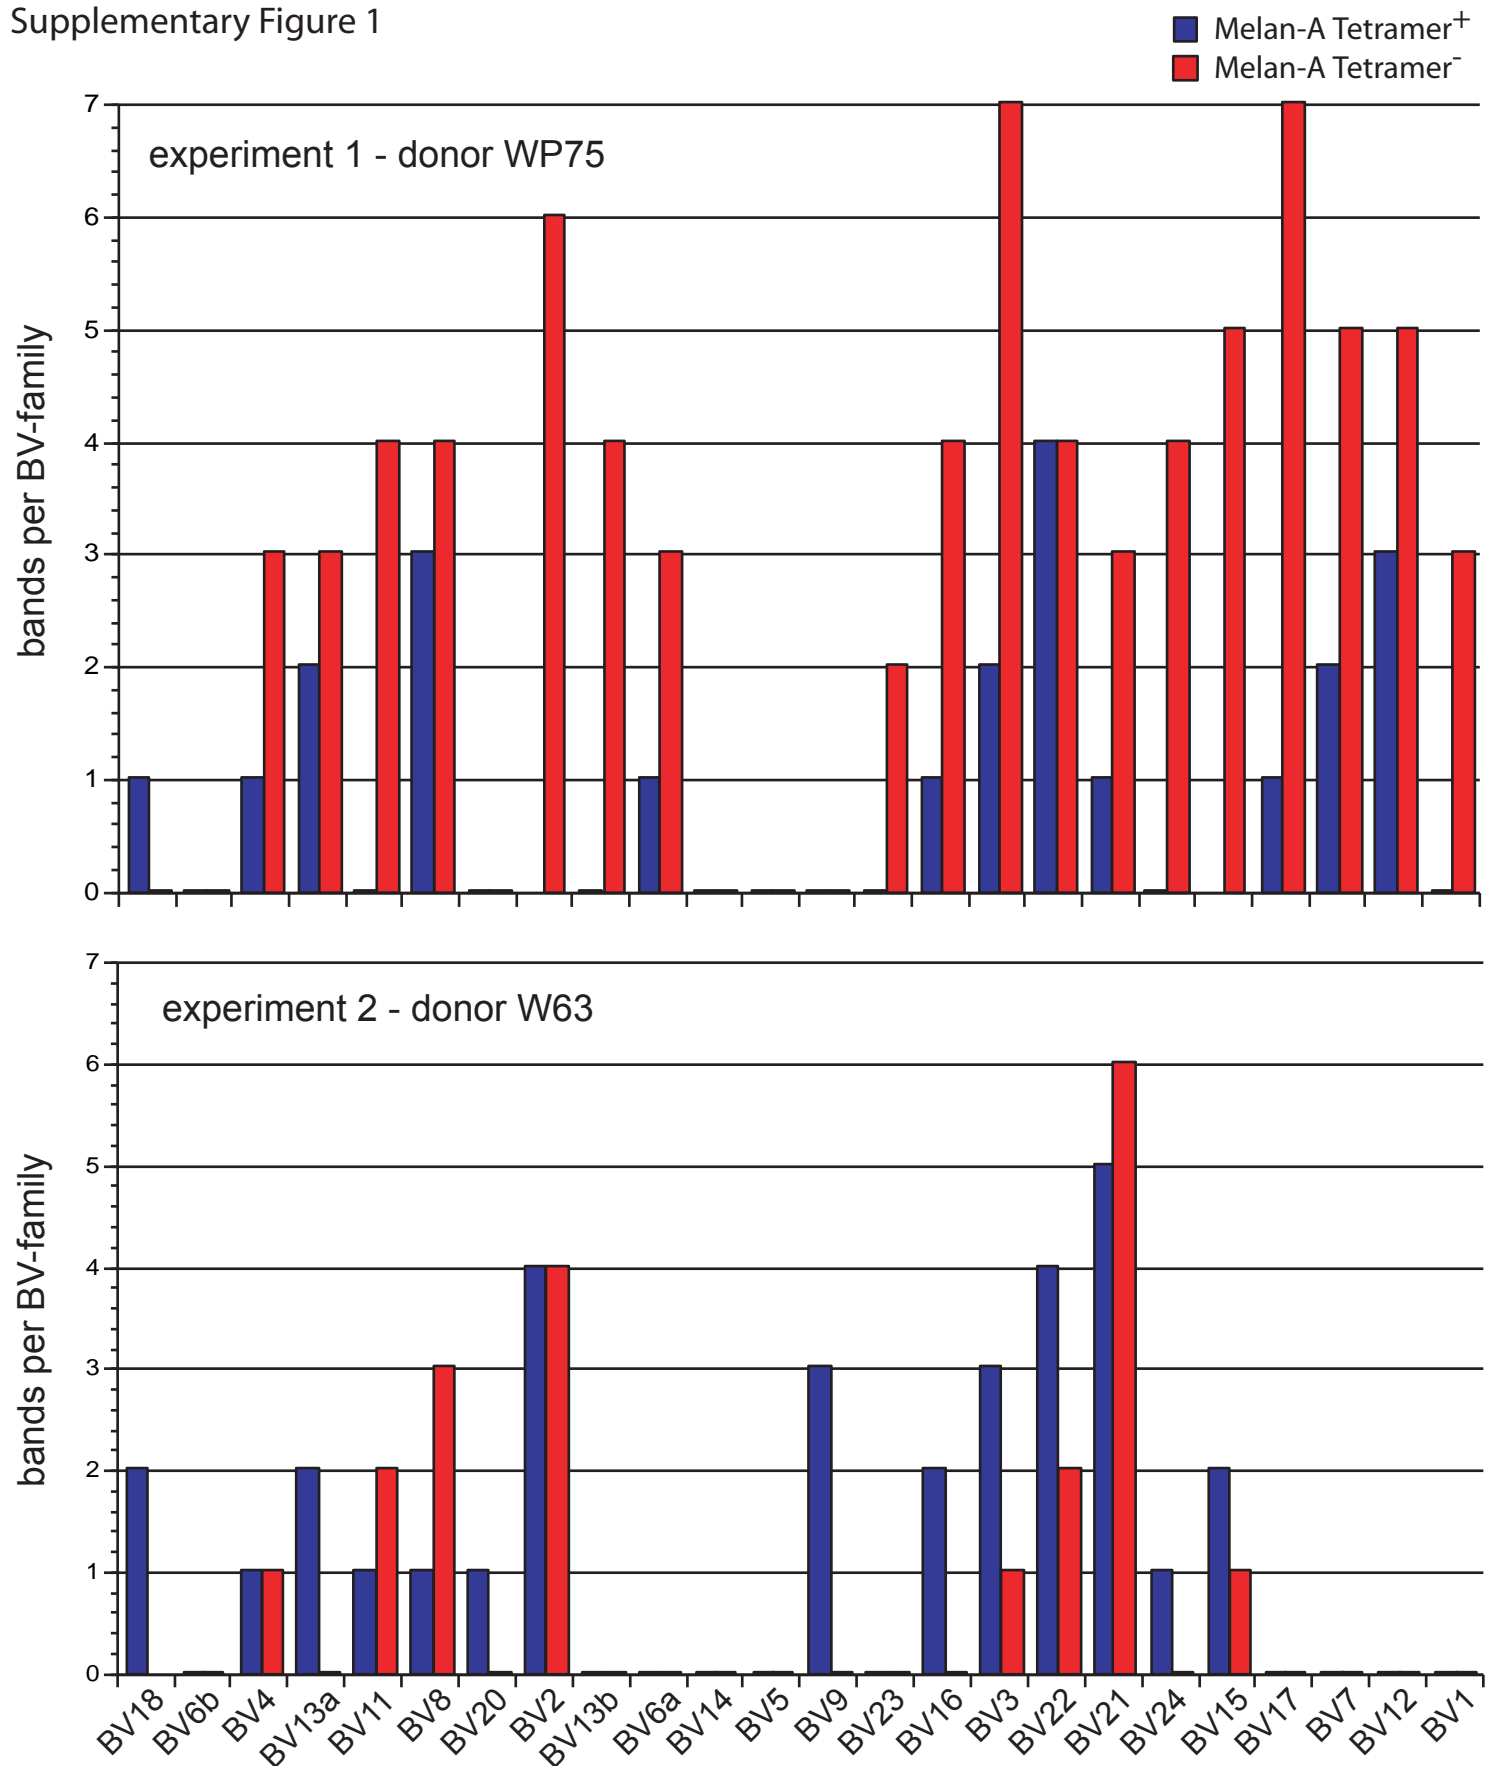

Figure S1: TCR-Immunescope analysis: T-cell lines were expanded following the procedures as described in this protocol. On day 10 of culture, cells were positively selected using Melan-A<sub>26-35</sub>A27L-MHC-Pentamer-APC followed by incubation with anti-APC-beads as described in Methods. The positive and the negative fraction were isolated. Purity was >95% Multimer<sup>+</sup> and <5% Multimer<sup>+</sup> cells respectively. TCR-Immunescope using 24 different BV-family specific primers was performed on both fractions: Multimer<sup>+</sup>: blue, Multimer<sup>-</sup>: red. Results from two different donors are shown. The number of detectable bands in each BV gene family is depicted. A similar repertoire was observed when analyzing non-purified Melan-A-specific T-cell-lines on day 10 of culture (not shown).

## Supplementary Figure 2

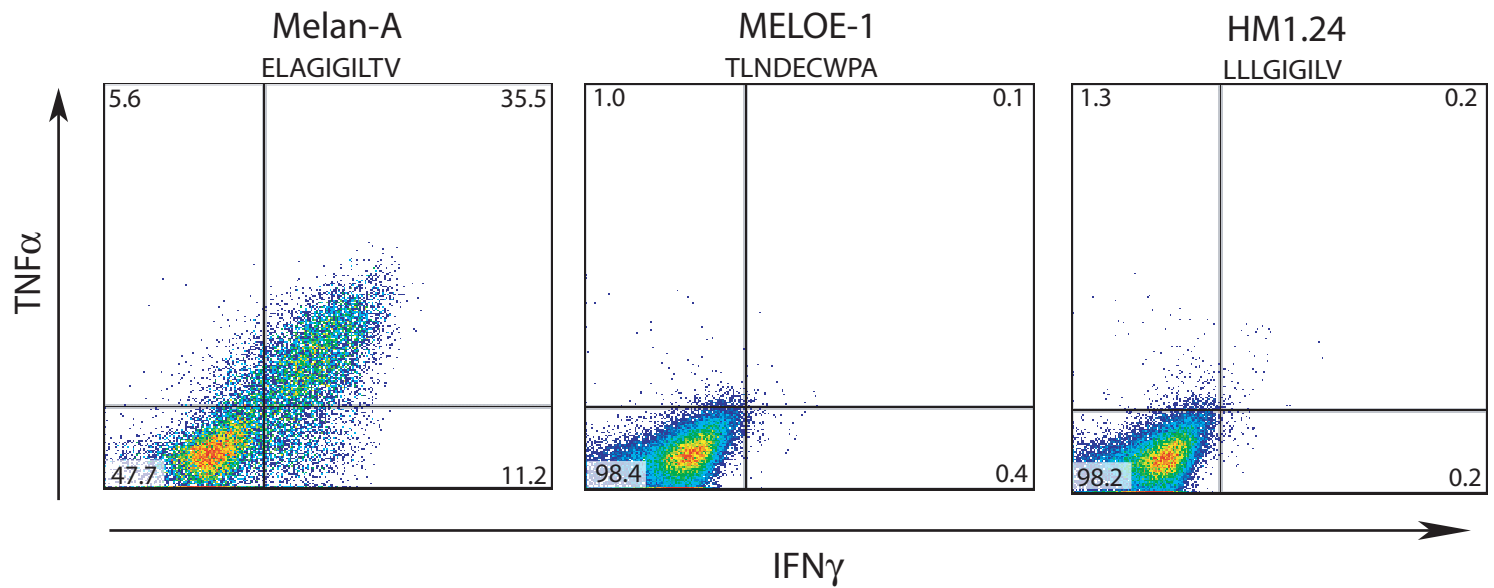

Figure S2: Assessment of crossreactivity of Melan-A<sub>26-35</sub>A27L-specific T-cells against the HM1.24<sub>22-30</sub> epitope. T-cells were stimulated with Melan-A<sub>26-35</sub>A27L and expanded as described. On day 11 T-cells were restimulated using autologous monocytes, which had been cultured overnight with GM-CSF/IL-4 containing medium as described in methods. Monocytes were pulsed with the respective peptides as indicated for each plot.

# Supplementary Figure 3

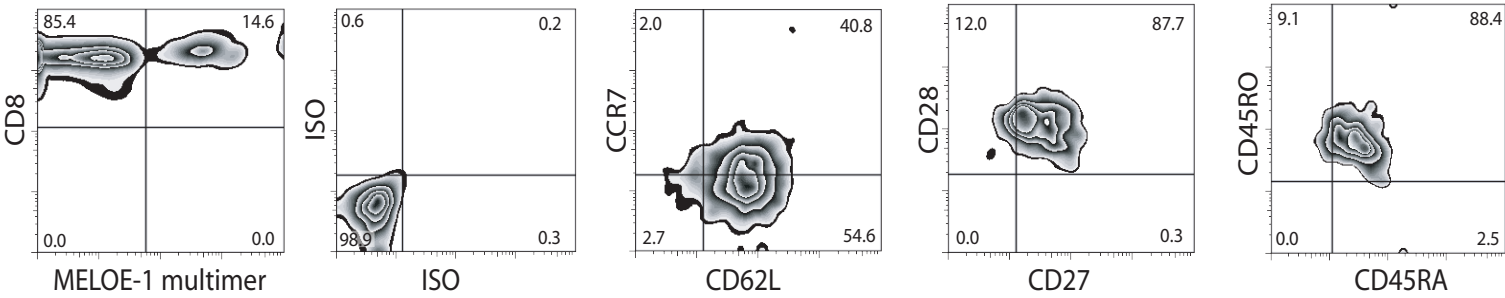

Figure S3: Phenotype of 10 day cultured MELOE-1-specific T-cells. Cells were gated according to live scatter plots, and then gated for CD8<sup>+</sup> MELOE-1 MHC-multimer<sup>+</sup> cells. Plots depicting the phenotype show CD8<sup>+</sup> MELOE-1-MHC-multimer<sup>+</sup> T-cells.

Supplementary Figure 4

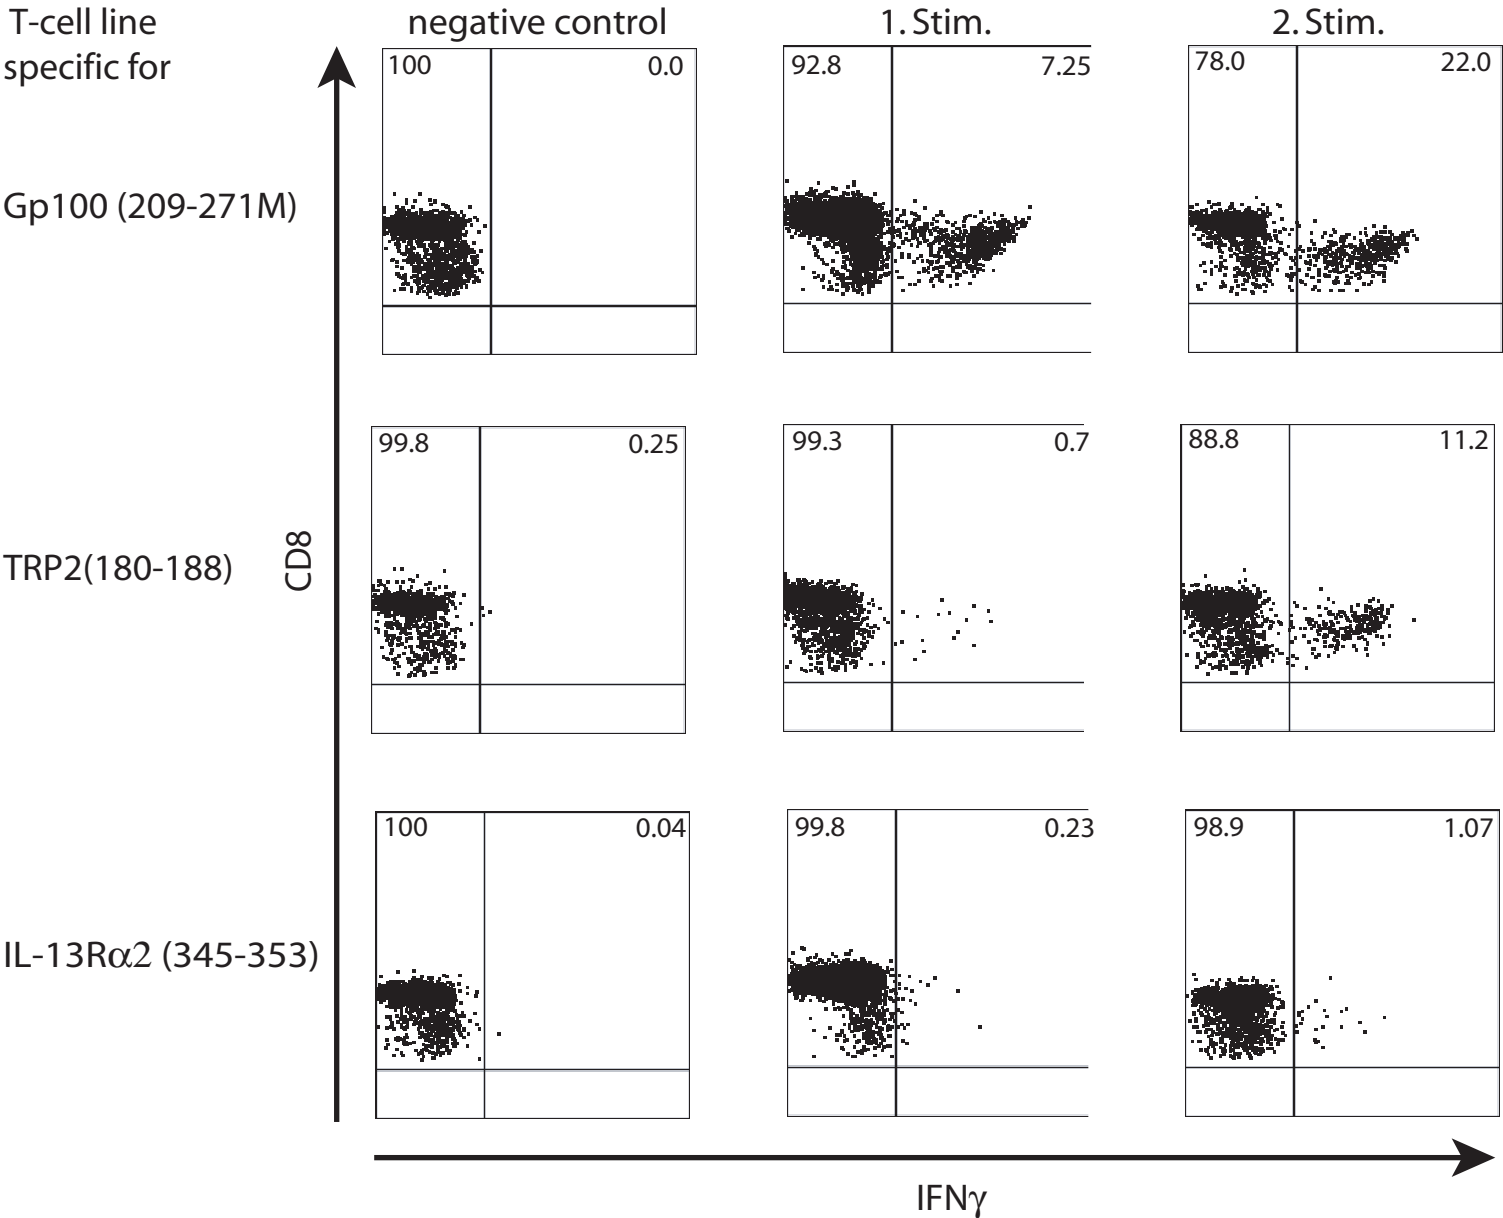

Figure S4: Interferon- $\gamma$  responses after stimulation with peptide-pulsed autologous monocytes to different cancer-associated antigens after one and two rounds of stimulation. Data illustrate data from Table I. As negative control T-cells were stimulated with unpulsed monocytes.
